# Supplementary material for: Boesenbergia stenophylla-Derived Stenophyllol B Exerts Antiproliferative and Oxidative Stress Responses in Triple-Negative Breast Cancer Cells with Few Side Effects in Normal Cells
Source: MDPI journal article supplement (doi:10.3390/ijms24097751), 2023-04-24
Supplement: s1 [file s1]

## SUPPLEMENTARY MATERIAL

### Stenophyllol B Spectral

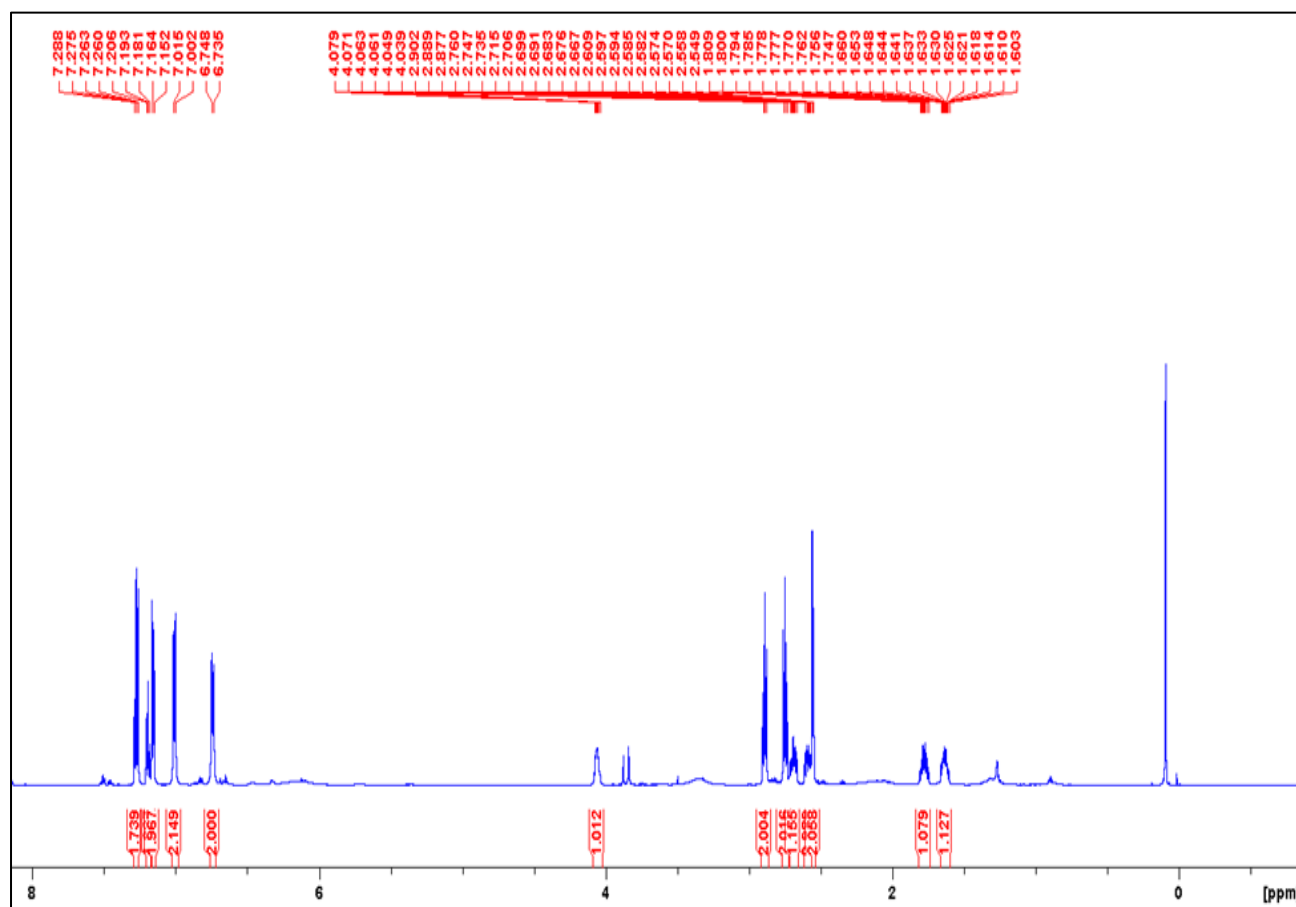

Figure S1. <sup>1</sup>H NMR spectrum (CDCl<sub>3</sub>, 600 MHz) of Stenophyllol B.

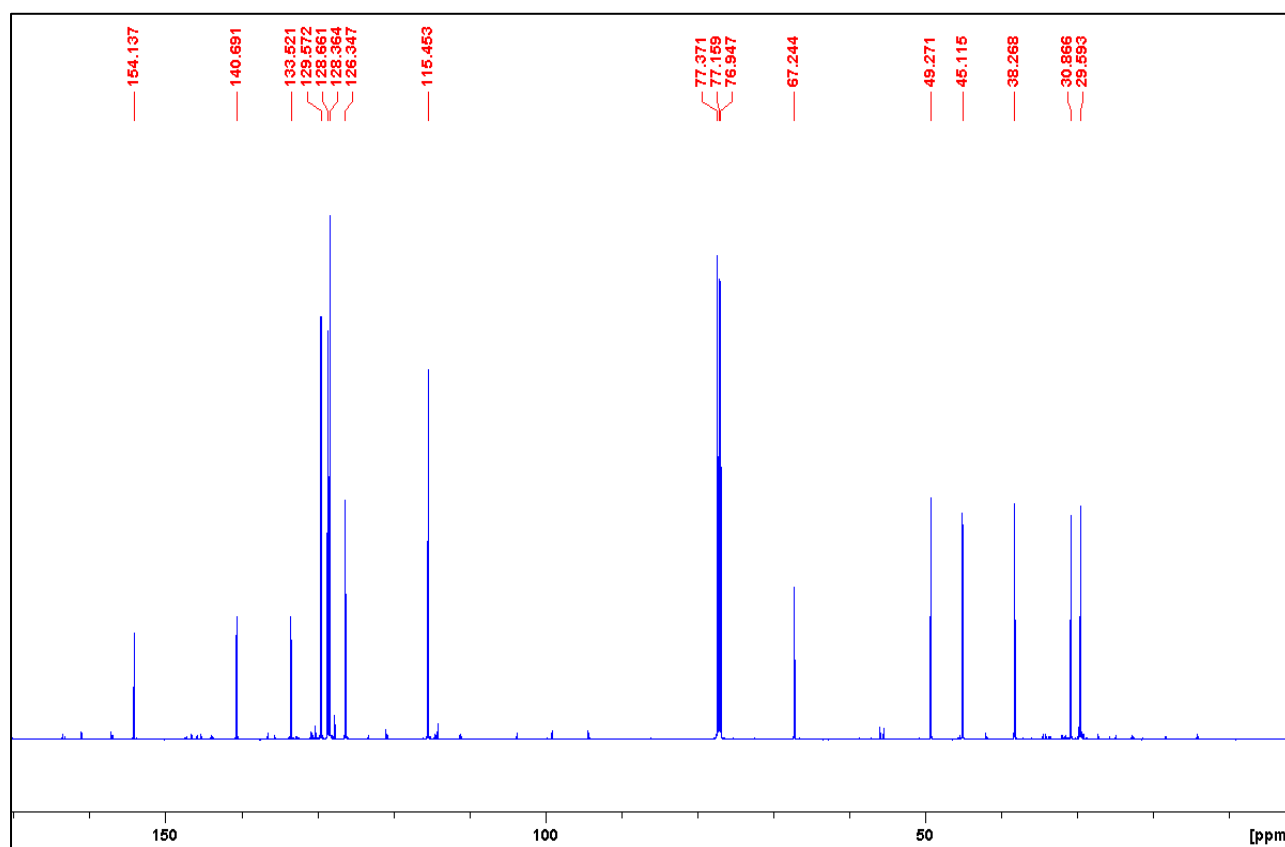

Figure S2. <sup>13</sup>C NMR spectrum (CDCl<sub>3</sub>, 150 MHz) of Stenophyllol B.
